# Supplementary material for: Socioeconomic Status and Overweight: A Population-Based Cross-Sectional Study of Japanese Children and Adolescents
Source: PubMed Central journal article supplement (PMC4483371; doi:10.2188/jea.je20140108), 2015-07-05
Supplement: je-25-463-s001.pdf [file je-25-463-s001.pdf]

**eTable 1.** Associations of SES indicators and maternal weight status with overweight: model-wise deletion analysis

|                                | Aged 6 to 11 years<br>Adjusted OR (95% CI)* | Aged 12 to 18 years<br>Adjusted OR (95% CI)* |
|--------------------------------|---------------------------------------------|----------------------------------------------|
| Household income               | (n = 328)                                   | (n = 314)                                    |
| High                           | 1.00                                        | 1.00                                         |
| Middle                         | 1.14 (0.53, 2.46)                           | 3.14 (1.15, 8.61) <sup>†</sup>               |
| Low                            | 0.38 (0.04, 3.30)                           | 1.09 (0.10, 11.54)                           |
| Household expenditure          | (n = 354)                                   | (n = 341)                                    |
| High                           | 1.00                                        | 1.00                                         |
| Middle                         | 0.87 (0.37, 2.05)                           | 1.21 (0.37, 3.97)                            |
| Low                            | 1.39 (0.61, 3.16)                           | 3.29 (1.13, 9.56) <sup>†</sup>               |
| Maternal Education             | (n = 340)                                   | (n = 329)                                    |
| >High school                   | 1.00                                        | 1.00                                         |
| High school                    | 0.86 (0.41, 1.81)                           | 1.33 (0.56, 3.17)                            |
| <High school                   | 1.52 (0.39, 5.96)                           | 2.51 (0.39, 16.12)                           |
| Paternal Education             | (n = 324)                                   | (n = 284)                                    |
| >High school                   | 1.00                                        | 1.00                                         |
| High school                    | 1.19 (0.57, 2.50)                           | 0.63 (0.25, 1.61)                            |
| <High school                   | 1.03 (0.23, 4.62)                           | 1.63 (0.36, 7.38)                            |
| Maternal Occupation            | (n = 363)                                   | (n = 352)                                    |
| Professional/manager           | 1.00                                        | 1.00                                         |
| Sales/service/clerical         | 1.71 (0.59, 4.94)                           | 1.20 (0.39, 3.69)                            |
| Security/transportation/labour | 0.51 (0.05, 5.00)                           | 2.07 (0.48, 8.86)                            |
| Others                         | 1.29 (0.46, 3.60)                           | 0.86 (0.25, 3.00)                            |
| Paternal Occupation            | (n = 315)                                   | (n = 278)                                    |
| Professional/manager           | 1.00                                        | 1.00                                         |
| Sales/service/clerical         | 0.90 (0.33, 2.45)                           | 1.71 (0.51, 5.76)                            |
| Security/transportation/labour | 1.59 (0.67, 3.75)                           | 1.35 (0.41, 4.44)                            |
| Others                         | 1.06 (0.18, 6.33)                           | 1.52 (0.30, 7.66)                            |

BMI, body mass index; CI, confidence interval; OR, odds ratio; SES, socioeconomic status.

\*Adjusted for age, sex, and maternal BMI

<sup>†</sup>p < 0.05
